# Supplementary material
Source: publisher site journal article supplement (https://www.dovepress.com/article/205023)
Supplement: Supplementary file 1 [file get_supplementary_file.php]

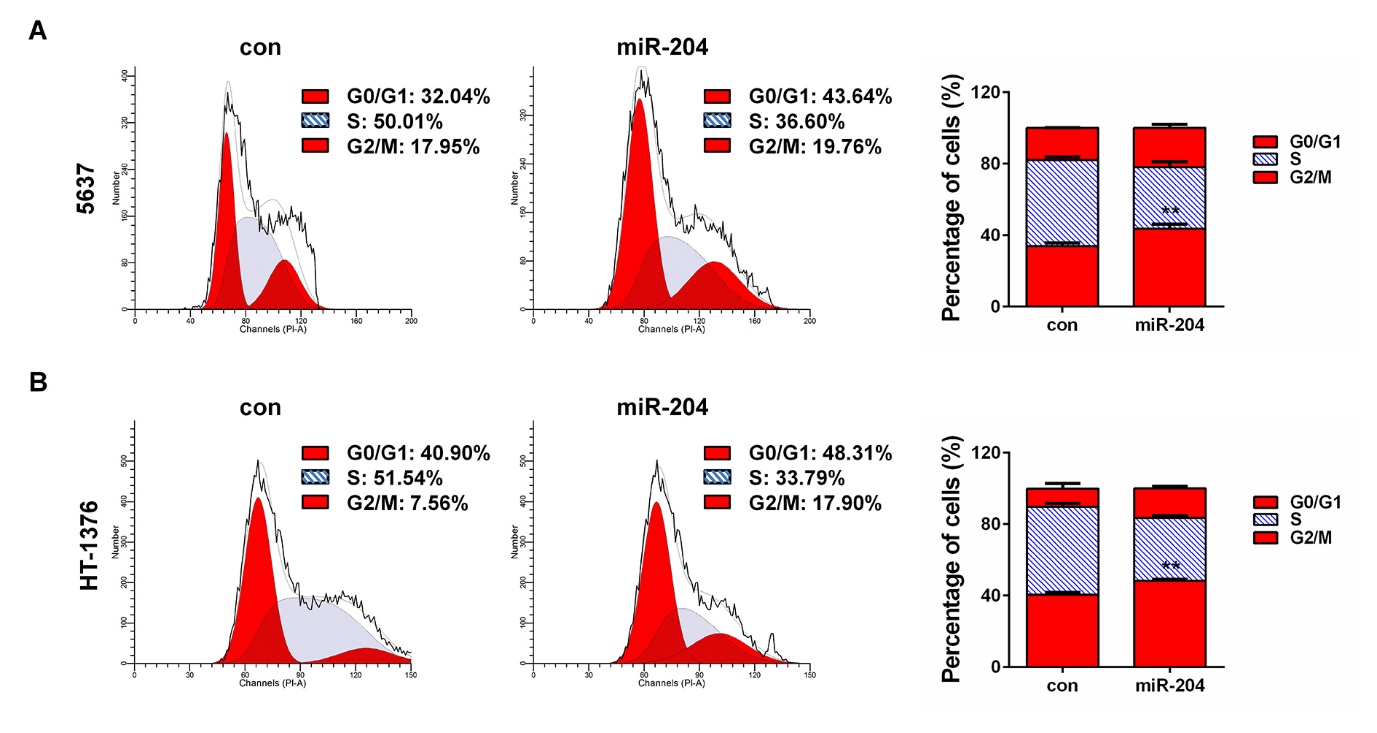


**Supplementary Figure 1: Overexpression of miR-204 results in significant G1 phase arrest in in bladder cancer cells.** Cell cycle assay was conducted 48h after miR-204 mimics transfection in **(A)** 5637 and **(B)** HT-1376 cells. The left panel depicts DNA content while the right shows the quantitative results. **: *P*<0.01.
